# Supplementary material
Source: Springer Nature journal article supplement (https://www.springermedizin.de/resource/supplementary/12889_2011_3429_MOESM1_ESM.pdf/9489050)
Supplement: MOESM1 [file 9489050]

DCD/motor  
impairment



↓ motor  
skill



↓ self esteem



↓ physical  
activity



↑ traditional  
electronic  
game use



↓ health
